# Supplementary material for: Stabilization of Foxp3 expression by CRISPR-dCas9-based epigenome editing in mouse primary T cells
Source: PubMed Central journal article supplement (PMC5422987; doi:10.1186/s13072-017-0129-1), 2017-05-08
Supplement: 13072_2017_129_MOESM2_ESM.pdf [file 13072_2017_129_MOESM2_ESM.pdf]

#C2-1

Species: Mouse (Mus musculus GRCm38/mm10)
Input: CTTGAGATTCTAAAATCCGTTGG
PAM: NGG

Table with columns: Chromosome, start, end, strand, MM, target\_seq, PAM, distance, position, gene name, gene id. Contains genomic data for various chromosomes (chrX, chr1, chr15, etc.) and associated genes (Foxp3, Pes1, Prr1, etc.).

#C2-7

Species: Mouse (Mus musculus GRCm38/mm10)
Input: TCCGGCCGCCATGACGTCAATGG
PAM: NGG

Table with columns: Chromosome, start, end, strand, MM, target\_seq, PAM, distance, position, gene name, gene id. Contains genomic data for various chromosomes (chrX, chr2, chr7, etc.) and associated genes (Foxp3, Gm14037, Chrd1, etc.).

#P-3

Species: Mouse (Mus musculus GRCm38/mm10)
Input: CACACTCATCAAAAAAAAAATTGG
PAM: NGG

Table with columns: Chromosome, start, end, strand, MM, target\_seq, PAM, distance, position, gene name, gene id. Contains genomic data for various chromosomes (chrX, chr4, chrX, etc.) and associated genes (Ppp1r3fos, Gm13214, Gpc3, etc.).

|       |           |             |                        |     |       |            |              |                    |
|-------|-----------|-------------|------------------------|-----|-------|------------|--------------|--------------------|
| chr13 | 61731925  | 61731947 +  | 4 GATATTCATAAAAAAAAAA  | TGG | 67954 | Intergenic | Gm19961      | ENSMUSG00000095905 |
| chr2  | 102691568 | 102691590 - | 3 CAGAGTCATCTAAAAAAAA  | AGG | 2375  | Intronic   | Slc1a2       | ENSMUSG0000005089  |
| chr11 | 99604483  | 99604505 -  | 4 AACAGCAACAAAAAAAAA   | AGG | 1175  | Intergenic | Gm11938      | ENSMUSG00000057674 |
| chr5  | 43659389  | 43659411 +  | 4 AACAAACAACAAAAAAAAA  | AGG | 2935  | Intergenic | Cc2d2a       | ENSMUSG00000039765 |
| chrX  | 61096487  | 61096509 -  | 4 CTAATTCATAAAAAAAAAA  | GGG | 4753  | Intergenic | Gm14663      | ENSMUSG00000083543 |
| chr6  | 144760427 | 144760449 - | 4 AACTTTCATTAAAAAAAAA  | TGG | 544   | Intronic   | Sox5os4      | ENSMUSG00000086282 |
| chr15 | 20348716  | 20348738 +  | 4 TAAACCCATTAAAAAAAAA  | GGG | NA    | Intergenic | NA           | NA                 |
| chr10 | 75477656  | 75477678 -  | 4 CAAAACAACAAAAAAAAA   | TGG | 28605 | Intronic   | Gucl1        | ENSMUSG00000033416 |
| chr15 | 25026774  | 25026796 +  | 4 TCCACTTATAAAAAAAAAA  | CGG | 430   | Intronic   | Gm2824       | ENSMUSG00000097452 |
| chr16 | 25167179  | 25167201 -  | 4 CAGGTCATAAAAAAAAAA   | AGG | 98121 | Intergenic | A230028O05Ri | ENSMUSG00000096960 |
| chr2  | 69687728  | 69687750 +  | 4 CCCTCCCATTAAAAAAAAA  | GGG | 588   | Intronic   | Fastkd1      | ENSMUSG00000027086 |
| chr14 | 74623048  | 74623070 -  | 3 CAGACTTATCTAAAAAAAA  | GGG | 17770 | Intergenic | Htr2a        | ENSMUSG00000034997 |
| chr1  | 149567938 | 149567960 - | 4 CAAAATAACAAAAAAAAA   | GGG | NA    | Intergenic | NA           | NA                 |
| chr1  | 177208323 | 177208345 + | 4 GACTCTAATGAAAAAAAAA  | AGG | 21546 | Intronic   | Gm37463      | ENSMUSG00000102427 |
| chr19 | 4969684   | 4969706 +   | 4 CTCAAACATTAAAAAAAAA  | AGG | 2689  | Intergenic | Mprl11       | ENSMUSG00000024902 |
| chr12 | 41949616  | 41949638 -  | 3 CAGATTTCACAAAAAAAAA  | GGG | 5343  | Intronic   | Impmp2l      | ENSMUSG00000056899 |
| chr8  | 60184386  | 60184408 +  | 4 CTCTCTAATGAAAAAAAAA  | GGG | NA    | Intergenic | NA           | NA                 |
| chr18 | 23494666  | 23494688 +  | 4 AAGACTCCTGAAAAAAAAA  | GGG | 19424 | Intronic   | Dtna         | ENSMUSG00000024302 |
| chr14 | 20540781  | 20540803 -  | 3 CACACCCTTAAAAAAAAA   | CGG | 5276  | Intronic   | 1810062O18Ri | ENSMUSG00000084925 |
| chrY  | 52373157  | 52373179 +  | 4 CATTCTGATAAAAAAAAAA  | GGG | 10820 | Intergenic | Gm28738      | ENSMUSG00000099565 |
| chrY  | 64969870  | 64969892 +  | 4 CATTCTGATAAAAAAAAAA  | GGG | 10822 | Intergenic | Gm28255      | ENSMUSG00000099386 |
| chrY  | 72148140  | 72148162 +  | 4 CATTCTGATAAAAAAAAAA  | GGG | 10829 | Intergenic | Gm29181      | ENSMUSG00000099731 |
| chrY  | 49670071  | 49670093 -  | 4 CATTCTGATAAAAAAAAAA  | GGG | 10838 | Intergenic | Gm28682      | ENSMUSG00000100564 |
| chrY  | 62289786  | 62289808 -  | 4 CATTCTGATAAAAAAAAAA  | GGG | 10842 | Intergenic | Gm28185      | ENSMUSG00000099626 |
| chrX  | 132699573 | 132699595 + | 4 CAACCTAATTAAAAAAAAA  | GGG | 17484 | Intergenic | Gm22143      | ENSMUSG00000088026 |
| chr10 | 113684543 | 113684565 - | 4 CATCTAATAAAAAAAAAA   | GGG | NA    | Intergenic | NA           | NA                 |
| chr1  | 145080821 | 145080843 + | 4 CCAACTCTAAAAAAAAAA   | AGG | 84108 | Intergenic | Gm6550       | ENSMUSG00000099617 |
| chr18 | 33285595  | 33285617 -  | 4 CACCTACATTAAAAAAAAA  | TGG | 71733 | Intergenic | Stard4       | ENSMUSG00000024378 |
| chr1  | 142266084 | 142266106 + | 4 CACTGCCATGAAAAAAAAA  | TGG | NA    | Intergenic | NA           | NA                 |
| chr1  | 74642970  | 74642992 -  | 4 AATACTGATCTAAAAAAAA  | TGG | 6076  | Intergenic | Stk36        | ENSMUSG00000033276 |
| chr5  | 59791361  | 59791383 +  | 4 AACACAAATGAAAAAAAAA  | AGG | 13038 | Intergenic | Gm43043      | ENSMUSG00000104889 |
| chr6  | 5450315   | 5450337 +   | 4 GACACAGATGAAAAAAAAA  | AGG | 17293 | Intergenic | Asb4         | ENSMUSG00000042607 |
| chr2  | 173621421 | 173621443 + | 4 CATAATGATGAAAAAAAAA  | TGG | 4480  | Intronic   | Ppp4r1-ps    | ENSMUSG00000055897 |
| chr14 | 66861086  | 66861108 +  | 4 TTCACTCAGAAAAAAAAAA  | GGG | 1365  | Intronic   | Dpysl2       | ENSMUSG00000022048 |
| chr10 | 32601465  | 32601487 -  | 4 AGCCTCACAAAAAAAAAA   | GGG | NA    | Intronic   | NA           | NA                 |
| chr11 | 4965261   | 4965283 +   | 4 CTCCTCCTTAAAAAAAAA   | TGG | 17197 | Intergenic | Nefh         | ENSMUSG00000020396 |
| chr6  | 106476791 | 106476813 + | 4 GACACTTTACAAAAAAAAA  | AGG | 12780 | Intronic   | Ctrn4        | ENSMUSG00000064293 |
| chr5  | 124550378 | 124550400 - | 3 CACACACAAAAAAAAAA    | TGG | 0     | Exonic     | Tmed2        | ENSMUSG00000029390 |
| chr13 | 117032245 | 117032267 + | 3 CACACCAAAAAAAAAAA    | AGG | 6729  | Intergenic | Parp8        | ENSMUSG00000021725 |
| chr16 | 46812755  | 46812777 -  | 4 AAATCTCAGAAAAAAAAAA  | GGG | NA    | Intergenic | NA           | NA                 |
| chr17 | 51001564  | 51001586 -  | 4 CATAATGTTAAAAAAAAAA  | TGG | 16890 | Intronic   | Tbcd1d5      | ENSMUSG00000023923 |
| chr7  | 59150755  | 59150777 -  | 3 CACACTGAATAAAAAAAAA  | GGG | 77973 | Intergenic | Ube3a        | ENSMUSG00000025326 |
| chrX  | 79673766  | 79673788 +  | 4 GGCCTGATCAGAAAAAAAA  | AGG | 2331  | Intergenic | Mageb16      | ENSMUSG00000046942 |
| chr3  | 143644226 | 143644248 + | 4 CATGCTCAGAAAAAAAAAA  | GGG | 642   | Intergenic | Gm38006      | ENSMUSG00000103816 |
| chrX  | 89826628  | 89826650 -  | 4 CACACAAATAAAAAAAAAA  | TGG | 20502 | Intergenic | Gm7108       | ENSMUSG00000083253 |
| chr15 | 38192561  | 38192583 +  | 4 CACAGAAATTAAAAAAAAA  | GGG | 26620 | Intergenic | Odf1         | ENSMUSG00000061923 |
| chr7  | 90875141  | 90875163 +  | 4 CACAGCAATAAAAAAAAAA  | AGG | NA    | Intergenic | NA           | NA                 |
| chr17 | 4370422   | 4370444 +   | 4 CCCAATCAAAAAAAAAAA   | GGG | NA    | Intergenic | NA           | NA                 |
| chrX  | 81933584  | 81933606 +  | 4 AAAACTAATCAGAAAAAAAA | GGG | NA    | Intergenic | NA           | NA                 |
| chr3  | 52621792  | 52621814 +  | 4 GACACACAAAAAAAAAA    | AGG | 7956  | Intergenic | Gm10293      | ENSMUSG00000070490 |
| chr10 | 56531248  | 56531270 -  | 4 TACACACAAAAAAAAAA    | GGG | NA    | Intergenic | NA           | NA                 |
| chr6  | 63776611  | 63776633 +  | 4 CAAAATCAGAAAAAAAAAA  | GGG | 7219  | Intronic   | RP23-133M12  | ENSMUSG00000108068 |
| chr11 | 120080058 | 120080080 + | 4 CATACTTTTTAAAAAAAAA  | AGG | 1164  | Intronic   | Cep131       | ENSMUSG00000039781 |
| chr4  | 109190294 | 109190316 + | 4 CATACTTTTTAAAAAAAAA  | TGG | 11789 | Intronic   | Osbpl9       | ENSMUSG00000028559 |
| chr2  | 93140629  | 93140651 +  | 4 AACACCCTCCAAAAAAAAA  | AGG | 42385 | Intergenic | Gm13802      | ENSMUSG00000087559 |
| chr11 | 92769292  | 92769314 +  | 4 CACAACCTTTAAAAAAAAA  | GGG | 717   | Intergenic | Gm11500      | ENSMUSG00000081363 |
| chr18 | 36677637  | 36677659 +  | 4 CAAACCCAGAAAAAAAAAA  | AGG | 132   | Intronic   | Sra1         | ENSMUSG0000006050  |
| chr10 | 62656250  | 62656272 +  | 4 AACACTTAAAAAAAAAA    | CGG | 2771  | Intergenic | Stox1        | ENSMUSG00000036923 |
| chr6  | 38992400  | 38992422 -  | 4 AACACTTAAAAAAAAAA    | GGG | 8075  | Intronic   | Gm42962      | ENSMUSG00000106737 |
| chr7  | 68940531  | 68940553 -  | 4 TACACTAACAAAAAAAAAA  | TGG | 11547 | Intergenic | Gm23795      | ENSMUSG00000065940 |
| chr3  | 11271385  | 11271407 +  | 4 TACACTTAAAAAAAAAA    | TGG | NA    | Intergenic | NA           | NA                 |
| chr1  | 174373723 | 174373745 - | 3 GACTCTCTCAATAAAAAA   | TGG | 802   | Intergenic | Olfra416-ps1 | ENSMUSG00000102920 |
| chr10 | 125534311 | 125534333 + | 4 CACTACTTTTAAAAAAAAA  | GGG | NA    | Intergenic | NA           | NA                 |
| chr8  | 61512044  | 61512066 +  | 4 CTCACTTAAAAAAAAAA    | TGG | 1180  | Intergenic | Palld        | ENSMUSG00000058056 |
| chr2  | 11088655  | 11088677 +  | 4 AAGACTCATTTAAAAAAAA  | GGG | 742   | Intergenic | Gm26478      | ENSMUSG00000084560 |
| chrX  | 95246470  | 95246492 +  | 4 AAAACTCATCAAAAAAAAA  | TGG | 6424  | Intergenic | Gm14807      | ENSMUSG00000080298 |
| chr15 | 90696252  | 90696274 +  | 3 CACACACATTGAAAAAAAA  | AGG | 16820 | Intergenic | Cpne8        | ENSMUSG00000052560 |
| chr3  | 111694740 | 111694762 - | 4 CAAACTAACGAAAAAAAAA  | AGG | 94730 | Intergenic | Gm42905      | ENSMUSG00000105882 |
| chrX  | 156911201 | 156911223 + | 4 CATACTAAAGAAAAAAAAA  | GGG | NA    | Intergenic | NA           | NA                 |
| chr10 | 60369049  | 60369071 +  | 4 CACTCTTAGAAAAAAAAAA  | TGG | 75277 | Intergenic | Gm24999      | ENSMUSG00000080668 |
| chr13 | 32685087  | 32685109 +  | 4 CTCACTCGGAAAAAAAAAA  | AGG | NA    | Intronic   | NA           | NA                 |
| chrX  | 150326938 | 150326960 + | 4 CACAGTAAAAAAAAAA     | AGG | 6033  | Intronic   | Gm15104      | ENSMUSG00000087360 |
| chr13 | 56634027  | 56634049 -  | 4 CAACCTCATTTAAAAAAAA  | TGG | 1038  | Intronic   | Tgfb1        | ENSMUSG00000035493 |
| chr14 | 38183959  | 38183981 +  | 4 CACACAAAAAAAAAA      | GGG | NA    | Intergenic | NA           | NA                 |
| chr1  | 16001073  | 16001095 -  | 4 CCCACACATGAAAAAAAAA  | TGG | 52240 | Intergenic | Gm7634       | ENSMUSG00000100652 |
| chr16 | 77246059  | 77246081 -  | 4 AACACTGATGAAAAAAAAA  | GGG | 8809  | Intronic   | Mir99ahg     | ENSMUSG00000090386 |
| chr1  | 44403677  | 44403699 -  | 4 AACACTAATCAAAAAAAAA  | AGG | 9230  | Intergenic | Gm28893      | ENSMUSG00000100769 |
| chrX  | 42631005  | 42631027 +  | 4 CACAAACATCAAAAAAAAA  | AGG | 11549 | Intronic   | Tenm1        | ENSMUSG0000006150  |
| chr13 | 54547670  | 54547692 +  | 4 CCCATACATCAATAAAAA   | AGG | 331   | Intronic   | Simc1        | ENSMUSG00000043183 |
| chr6  | 75807033  | 75807055 -  | 4 CTCACTACTCAATAAAAA   | GGG | 24277 | Intergenic | Gm9001       | ENSMUSG00000080824 |
| chr11 | 27801123  | 27801145 -  | 4 AACAAATCAACAAAAAA    | TGG | 81967 | Intergenic | Gm12079      | ENSMUSG00000084064 |
| chr6  | 22061717  | 22061739 +  | 4 CAGGCTCATCTCAAAAAA   | AGG | 1765  | Intronic   | Cped1        | ENSMUSG00000062980 |
| chr16 | 59951780  | 59951802 -  | 4 CACTCCCATAAGAAAAAA   | GGG | 2850  | Intronic   | Epha6        | ENSMUSG00000055540 |
| chr15 | 42826576  | 42826598 +  | 4 CCCACCACCAACAAAAAA   | GGG | NA    | Intergenic | NA           | NA                 |
| chr2  | 124841029 | 124841051 + | 4 CAAACTGATAAGAAAAAA   | TGG | NA    | Intergenic | NA           | NA                 |

|       |           |             |                              |     |       |            |              |                    |
|-------|-----------|-------------|------------------------------|-----|-------|------------|--------------|--------------------|
| chr7  | 89381382  | 89381404 -  | 3 CGCACTCATAAAAAATAAT        | AGG | 12963 | Intronic   | Gm28748      | ENSMUSG00000101924 |
| chr2  | 43854206  | 43854228 +  | 4 GACACACACTGTGAAAAAATAAT    | GGG | 2578  | Intronic   | Arhgap15     | ENSMUSG00000049744 |
| chr11 | 5217092   | 5217114 +   | 4 CTC AATGAT AAAGAAAAAATAAT  | TGG | 1561  | Intronic   | Kremen1      | ENSMUSG00000020393 |
| chr11 | 16115910  | 16115932 +  | 4 CACATCCACAGAAAAAATAAT      | TGG | 77482 | Intergenic | Gm37319      | ENSMUSG00000104323 |
| chrX  | 41199611  | 41199633 +  | 4 CACACACTTTGAAAAAATAAT      | TGG | 48942 | Intergenic | Gm5385       | ENSMUSG00000081880 |
| chr8  | 114216907 | 114216929 + | 4 GAGACTCATCCGAAAAAATAAT     | TGG | 10960 | Intronic   | Vat11        | ENSMUSG00000046844 |
| chr6  | 117224017 | 117224039 + | 4 CATACATATCAAATAAATAAT      | AGG | 9951  | Intergenic | Rpl28-ps4    | ENSMUSG00000090549 |
| chr1  | 171664882 | 171664904 + | 4 CACAACAACACAAAAAATAAT      | CGG | 11780 | Intergenic | A630035G10Ri | ENSMUSG00000103083 |
| chr4  | 126013592 | 126013614 + | 4 CACACACCAGATAAAAAAATAAT    | AGG | 10936 | Intergenic | Csf3r        | ENSMUSG00000028859 |
| chr1  | 158010035 | 158010057 - | 4 CACACTGTTGGAAAAAATAAT      | AGG | 47186 | Intronic   | Gm38256      | ENSMUSG00000102789 |
| chr8  | 23775579  | 23775601 -  | 3 CACACTGAACAACAAAAAATAAT    | GGG | 21741 | Intronic   | Zmat4        | ENSMUSG00000037492 |
| chr10 | 37025826  | 37025848 +  | 4 CATACACATGAAGAAAAAATAAT    | TGG | 23937 | Intergenic | Hdac2        | ENSMUSG00000019777 |
| chr8  | 117060110 | 117060132 - | 3 CTC ACTCACAAAAATAAATAAT    | AGG | 376   | Intronic   | Pkd1l2       | ENSMUSG00000034416 |
| chr8  | 95816602  | 95816624 -  | 3 CACACACATAAAAAATAAATAAT    | GGG | 156   | Intronic   | 4930513N10Ri | ENSMUSG00000074136 |
| chr16 | 12296093  | 12296093 -  | 3 CACACATAAAAAATAAATAAT      | AGG | 25191 | Intergenic | Shisa9       | ENSMUSG00000022494 |
| chr4  | 142657335 | 142657357 - | 4 CCAACTGATCAAAAAGAAAAATAAT  | GGG | NA    | Intergenic | NA           | NA                 |
| chr3  | 147193983 | 147194005 - | 4 AACATTGATAAAACAAAAAATAAT   | AGG | 1065  | Intergenic | Gm6074       | ENSMUSG00000103099 |
| chr7  | 46346426  | 46346448 -  | 4 AACACTAAACAAATAAATAAT      | GGG | 3456  | Intergenic | Gm38176      | ENSMUSG00000103826 |
| chr6  | 126469680 | 126469702 + | 4 CACACACTGGAAGAAAAAATAAT    | AGG | 62849 | Intergenic | Kcna5        | ENSMUSG00000045534 |
| chr15 | 4570368   | 4570390 -   | 4 TGCTCTCATCAAAAAGAAAAATAAT  | AGG | 4334  | Intronic   | Plcxd3       | ENSMUSG00000049148 |
| chr18 | 45073915  | 45073937 -  | 4 CATATTTGATCAAAAAATAAATAAT  | GGG | 15389 | Intergenic | Gm26928      | ENSMUSG00000098244 |
| chr6  | 35353495  | 35353517 -  | 4 CCCCTCTTCAAAAAGAAAAATAAT   | CGG | 16670 | Intergenic | 170065J11Ri  | ENSMUSG00000107341 |
| chr6  | 42674597  | 42674619 +  | 3 CACACACACTAAGAAAAAATAAT    | TGG | 423   | Intronic   | Tcaf1        | ENSMUSG00000036667 |
| chr5  | 113084060 | 113084082 - | 4 CACCATGATCAAAAATAAATAAT    | TGG | 2241  | Intergenic | 290026A02Ri  | ENSMUSG00000051339 |
| chr9  | 67372263  | 67372285 +  | 4 CACACGCCTCTTAAAAAATAAT     | TGG | 1496  | Intronic   | Tln2         | ENSMUSG00000052698 |
| chr10 | 40425081  | 40425103 -  | 4 CACAGTCTTAAATAAATAAATAAT   | GGG | 9201  | Intronic   | Cdk19        | ENSMUSG00000038481 |
| chr9  | 114703269 | 114703291 + | 4 CAAACACATAAAATAAATAAT      | AGG | 1763  | Intronic   | Dync1li1     | ENSMUSG00000032435 |
| chr17 | 35599132  | 35599154 -  | 4 CATACACATAAAATAAATAAT      | AGG | 2395  | Intergenic | Sfta2        | ENSMUSG00000090509 |
| chr11 | 95419490  | 95419512 -  | 4 CATACACATAAAATAAATAAT      | AGG | 5086  | Intronic   | Spop         | ENSMUSG00000057522 |
| chr5  | 24276066  | 24276088 +  | 4 CATACACATTAATAAATAAATAAT   | AGG | 19029 | Intergenic | Gm9836       | ENSMUSG00000081071 |
| chr14 | 60120497  | 60120519 +  | 4 CATACACATAAAATAAATAAT      | AGG | 20544 | Intronic   | Gm6913       | ENSMUSG00000075288 |
| chr9  | 30253775  | 30253797 +  | 4 CATACACATAAAATAAATAAT      | AGG | 38071 | Intergenic | Gm26435      | ENSMUSG00000096018 |
| chr16 | 40465289  | 40465311 +  | 4 CATACACATAAAATAAATAAT      | AGG | 97352 | Intronic   | Gm27887      | ENSMUSG00000098472 |
| chr10 | 129812675 | 129812697 + | 4 CAAAGTCTCAAAAATAAATAAT     | AGG | 10152 | Intergenic | Olfir11      | ENSMUSG00000063173 |
| chr6  | 134250297 | 134250319 + | 4 CCCAGCATCAAAAAGAAAAATAAT   | GGG | 1493  | Intronic   | Etv6         | ENSMUSG00000030199 |
| chr3  | 120119547 | 120119569 - | 4 CCCCTAATTAACAAAAAATAAT     | AGG | NA    | Intergenic | NA           | NA                 |
| chrX  | 113387656 | 113387678 - | 4 CTCTCTCACAAAAATAAATAAT     | GGG | 55431 | Intronic   | Gm24831      | ENSMUSG00000080428 |
| chr6  | 51272825  | 51272847 +  | 3 CACACTGAGCAAAAGAAAAATAAT   | AGG | 2915  | Intergenic | Mir148a      | ENSMUSG00000065505 |
| chr18 | 65971111  | 65971133 -  | 4 CACCATCATCACAAAAAATAAT     | AGG | 933   | Intergenic | Cplx4        | ENSMUSG00000024519 |
| chr5  | 76442127  | 76442149 +  | 4 AGCACTCATAAAAACAAAAATAAT   | TGG | 8552  | Intergenic | Gm42665      | ENSMUSG00000106982 |
| chr8  | 54271199  | 54271221 +  | 4 ACCACTGATGAAAACAAAAATAAT   | TGG | 84745 | Intergenic | Vegfc        | ENSMUSG00000031520 |
| chr10 | 62635557  | 62635579 -  | 4 CACATGCATAAAATAAATAAT      | AGG | 1431  | Intronic   | Ddx50        | ENSMUSG00000020076 |
| chr14 | 87082295  | 87082317 +  | 3 CACACACATTAATAAATAAATAAT   | AGG | 8661  | Intronic   | Diap3        | ENSMUSG00000022021 |
| chr19 | 24622389  | 24622411 -  | 3 CACACACATTAATAAATAAATAAT   | AGG | 51597 | Intergenic | Tmem252      | ENSMUSG00000048572 |
| chr7  | 73075279  | 73075301 -  | 4 CACACAAATCCACAAAAAATAAT    | GGG | 14122 | Intergenic | RP24-136L4.3 | ENSMUSG00000108329 |
| chr2  | 61969874  | 61969896 +  | 4 CACACTACTGAATAAAAAATAAT    | GGG | 458   | Intergenic | Gm13555      | ENSMUSG00000083018 |
| chr14 | 96244853  | 96244875 +  | 4 AAAACTAATCAAAAAGAAAAATAAT  | TGG | 4459  | Intronic   | Khl1         | ENSMUSG00000022076 |
| chr17 | 77080627  | 77080649 -  | 4 AAAACTGATCAAAAAGAAAAATAAT  | AGG | NA    | Intergenic | NA           | NA                 |
| chrX  | 42143126  | 42143148 +  | 4 CAGACTTCTCAAAAACAAAAATAAT  | TGG | 4840  | Intergenic | Gm37564      | ENSMUSG00000104042 |
| chr1  | 110268779 | 110268801 - | 4 CACAACATCATTAAAAAATAAT     | TGG | NA    | Intergenic | NA           | NA                 |
| chr7  | 64289198  | 64289220 +  | 4 CACAATAATTAAGAAAAAATAAT    | CGG | 799   | Intronic   | Mtmr10       | ENSMUSG00000030522 |
| chrX  | 22201803  | 22201825 -  | 4 AACATGATAAAAAATAAATAAT     | AGG | 3345  | Intergenic | Gm14563      | ENSMUSG00000082175 |
| chr8  | 39755438  | 39755460 +  | 4 CACAAGCAACAAAAGAAAAATAAT   | AGG | NA    | Intergenic | NA           | NA                 |
| chr18 | 88965295  | 88965317 +  | 4 CATACACATAAAAAATAAATAAT    | AGG | 6473  | Intergenic | Rttm         | ENSMUSG00000023066 |
| chr1  | 32967777  | 32967799 +  | 3 TACACGGATCAAAAATAAATAAT    | TGG | 0     | Exonic     | Gm37151      | ENSMUSG00000102926 |
| chr18 | 58506909  | 58506931 +  | 4 AACAGTCTCAAAAATAAATAAT     | GGG | 49326 | Intergenic | Sic27a6      | ENSMUSG00000024600 |
| chr5  | 102397266 | 102397288 + | 4 CATGTGATCAAAAACAAAAATAAT   | TGG | 18915 | Intergenic | Gm42932      | ENSMUSG00000106295 |
| chr8  | 103567847 | 103567869 - | 4 CACATTTAACAACAAAAATAAT     | GGG | NA    | Intergenic | NA           | NA                 |
| chr8  | 33005176  | 33005198 +  | 4 CATATTCTCAAAAAGAAAAATAAT   | AGG | 55150 | Intergenic | Gm3985       | ENSMUSG00000079070 |
| chr10 | 92597307  | 92597329 -  | 4 CACAATCCACAAAACAAAAATAAT   | TGG | 10000 | Intergenic | Gm22582      | ENSMUSG00000076238 |
| chr6  | 18382266  | 18382288 -  | 4 CACAGTAATCAGAGAAAAATAAT    | AGG | 458   | Intronic   | Cttnbp2      | ENSMUSG00000004161 |
| chr14 | 73986018  | 73986040 -  | 4 TACACACACAAAAAGAAAAATAAT   | AGG | 30467 | Intergenic | Cbx3-ps6     | ENSMUSG00000057886 |
| chr14 | 61743550  | 61743572 +  | 4 CAGATTGACCAAAAACAAAAATAAT  | AGG | 57894 | Intergenic | Gm37820      | ENSMUSG00000104187 |
| chr9  | 47797088  | 47797110 -  | 4 CACATTCATCATAAGAAAAATAAT   | GGG | 297   | Intronic   | Cadm1        | ENSMUSG00000032076 |
| chr10 | 15886115  | 15886137 -  | 4 CACAATCTTTAAAAGAAAAATAAT   | AGG | NA    | Intergenic | NA           | NA                 |
| chr4  | 92324975  | 92324997 +  | 4 GACCCCATCAAAAAGAAAAATAAT   | AGG | 48054 | Intergenic | Gm12638      | ENSMUSG00000083296 |
| chr14 | 80416664  | 80416686 +  | 4 TACACACATCAGAACAAAAATAAT   | AGG | 74179 | Intergenic | Gm9578       | ENSMUSG00000098125 |
| chr5  | 81444339  | 81444361 -  | 4 CTCATTGATGAAAAAGAAAAATAAT  | TGG | 20834 | Intronic   | Adgrl3       | ENSMUSG00000037605 |
| chr9  | 63117106  | 63117128 -  | 4 AACACTGATCACAAGAAAAATAAT   | GGG | 16155 | Intergenic | Gm25064      | ENSMUSG00000094201 |
| chr3  | 19776589  | 19776611 +  | 4 CACAACCAGCAAAAATAAATAAT    | AGG | 7334  | Intergenic | Gm7442       | ENSMUSG00000106182 |
| chr3  | 158473852 | 158473874 + | 4 CTCACTAATTAAAAACAAAAATAAT  | AGG | 15117 | Intronic   | Gm43487      | ENSMUSG00000105683 |
| chr3  | 106374685 | 106374707 + | 4 CAAAAGTTATCAAAAAGAAAAATAAT | TGG | 378   | Intergenic | Gm43212      | ENSMUSG00000105436 |
| chr1  | 186065171 | 186065193 - | 4 AACACTCTTAAAAATAAATAAT     | AGG | 22538 | Intergenic | Lyplal1      | ENSMUSG00000039246 |
| chrX  | 114886348 | 114886370 + | 4 CAAAAGTCATCAACATAAATAAT    | TGG | 18642 | Intergenic | Ube2dn1l     | ENSMUSG00000050435 |
| chr4  | 127593345 | 127593367 + | 3 CACACACACAAAAATAAATAAT     | AGG | 22843 | Intergenic | A630031M04Ri | ENSMUSG00000087470 |
| chr15 | 64037388  | 64037410 +  | 4 CACATTCACAAAAATAAATAAT     | GGG | 11336 | Intronic   | Gm25628      | ENSMUSG00000065936 |
| chr18 | 72323672  | 72323694 +  | 4 CCTACTGATCATAAACAAAAATAAT  | AGG | 26662 | Intronic   | Dcc          | ENSMUSG00000060534 |
| chrX  | 147457301 | 147457323 - | 4 CACAATAATAAAAAATAAATAAT    | TGG | 3594  | Intergenic | Vmn1r239-ps  | ENSMUSG00000067262 |
| chrX  | 109677819 | 109677841 + | 4 CTCTCTCATCAGAACAAAAATAAT   | GGG | NA    | Intergenic | NA           | NA                 |
| chr1  | 185420854 | 185420876 + | 4 CACACCCACAAAAATAAATAAT     | GGG | 567   | Intronic   | Eprs         | ENSMUSG00000026615 |
| chr18 | 20930451  | 20930473 +  | 4 CACACCCCAAAAAATAAATAAT     | AGG | 14152 | Intergenic | Rnf125       | ENSMUSG00000033107 |
| chr6  | 30408069  | 30408091 +  | 4 CACTCTCTTAAAAAGAAAAATAAT   | AGG | 5919  | Intronic   | Klhdc10      | ENSMUSG00000029775 |
| chr5  | 132604077 | 132604099 - | 4 CACACACCTTAAAAAGAAAAATAAT  | AGG | 53444 | Intergenic | Gm42626      | ENSMUSG00000105809 |
| chr4  | 36774309  | 36774331 -  | 4 TACAGTCATAAAAAACAAATAAT    | TGG | 18155 | Intronic   | Gm23314      | ENSMUSG00000087843 |
| chr15 | 54035583  | 54035605 +  | 3 CACACTCTCAAAAGTAAATAAT     | TGG | 0     | Exonic     | Gm26933      | ENSMUSG00000097938 |

|       |           |             |                         |     |    |                  |              |                     |
|-------|-----------|-------------|-------------------------|-----|----|------------------|--------------|---------------------|
| chr2  | 158276185 | 158276207 + | 4 AACACTGATAAAAAAAGAAT  | GGG |    | 196 Intronic     | Bpi          | ENSMUSG00000052922  |
| chr5  | 53858375  | 53858397 -  | 4 CATACTCTTAAAAAAGAAT   | AGG |    | 1453 Intronic    | Tbc1d19      | ENSMUSG00000039178  |
| chr1  | 161545010 | 161545032 - | 4 CAAAGTTATCAAAAAAAGAT  | AGG |    | 7517 Intergenic  | Gm25488      | ENSMUSG00000089353  |
| chr10 | 126373434 | 126373456 - | 4 TACATTCATCAAAATATAAT  | CGG | NA | Intergenic       | NA           | NA                  |
| chr9  | 6582992   | 6583014 -   | 4 CACACTGTTTCATAAAGAAT  | AGG | NA | Intergenic       | NA           | NA                  |
| chr17 | 72484749  | 72484771 -  | 4 CTGACTCATCAATAATAAT   | TGG |    | 14518 Intronic   | Gm24736      | ENSMUSG00000089487  |
| chr13 | 89988220  | 89988242 +  | 4 CACAGCCATCACAAAAGAAT  | AGG |    | 2831 Intronic    | Xrcc4        | ENSMUSG00000021615  |
| chrX  | 48088706  | 48088728 +  | 4 CACAGCCATCAAAACGAAT   | GGG |    | 19997 Intergenic | Xpnp2p2      | ENSMUSG00000037005  |
| chr5  | 120736718 | 120736740 - | 4 CACATTTGTCAAAAAACAT   | AGG |    | 534 Intronic     | Oas2         | ENSMUSG00000032690  |
| chr18 | 5454256   | 5454278 -   | 4 CCCACACATCAACAAAAGAAT | AGG |    | 37225 Intergenic | Gm10125      | ENSMUSG00000063087  |
| chr18 | 9667604   | 9667626 -   | 4 GACACTAATGAAAAAATAT   | TGG |    | 40022 Intergenic | Colec12      | ENSMUSG00000036103  |
| chr12 | 4081925   | 4081947 -   | 4 CTTACACATCAAAAAAATTT  | TGG |    | 627 Intergenic   | Dnajc27      | ENSMUSG00000020657  |
| chr11 | 13589042  | 13589064 -  | 4 AACACTGATCAAAATCAAAAT | TGG | NA | Intergenic       | NA           | NA                  |
| chr17 | 55644577  | 55644599 +  | 4 AACAAATCATCAAAAGAAT   | TGG |    | 7426 Intergenic  | Pot1b        | ENSMUSG00000024174  |
| chr1  | 73602311  | 73602333 +  | 4 CACAGACATCAAAACGAAT   | GGG |    | 15755 Intergenic | 6030407O03Ri | ENSMUSG00000100301  |
| chr15 | 50123984  | 50124006 +  | 4 CACACATATGAAAAAACAT   | TGG | NA | Intergenic       | NA           | NA                  |
| chr4  | 111230136 | 111230158 + | 4 CACCCTGATCAAAAGCAAAAT | TGG |    | 28162 Intronic   | Agbl1        | ENSMUSG000000061298 |
| chrX  | 147134789 | 147134811 + | 4 CACAATAATCAAAAGCAAAAT | TGG |    | 23399 Intronic   | Mir448       | ENSMUSG00000065450  |
| chr7  | 142060650 | 142060672 + | 4 CACTCTCTCAAAAGTAAAT   | TGG |    | 313 Intronic     | Mob2         | ENSMUSG00000025147  |
| chr2  | 26989725  | 26989747 +  | 4 CACCCCATCAGAAAAACAT   | GGG |    | 306 Intronic     | Adams13      | ENSMUSG00000014852  |
| chr4  | 108120313 | 108120335 - | 4 CAGACTCTCAAAATAACAAT  | CGG |    | 1781 Intronic    | Scp2         | ENSMUSG00000028603  |
| chr15 | 89551327  | 89551349 -  | 3 AACATTGATCAAAAAAAGAT  | AGG |    | 1445 Intronic    | Shank3       | ENSMUSG00000022623  |
| chr1  | 91588929  | 91588951 +  | 4 CAGACACATTAAAAAAAGT   | GGG |    | 22455 Intergenic | Gm28380      | ENSMUSG00000101705  |
| chr5  | 146928876 | 146928898 - | 3 CACCATCATCAAAAAAATAA  | TGG |    | 19759 Intergenic | Gtf3a        | ENSMUSG00000016503  |
| chr8  | 54801849  | 54801871 -  | 4 CAAACTGATCAAAACAGAAT  | GGG |    | 26427 Intronic   | Wdr17        | ENSMUSG00000039375  |
| chr15 | 21090457  | 21090479 -  | 4 GTCTCTCATCAAAAAAATAA  | AGG |    | 20973 Intergenic | Cdh12        | ENSMUSG00000040452  |
| chrX  | 136984738 | 136984760 - | 4 CACACATACCAAAAAAATTT  | TGG |    | 1117 Intronic    | Slc25a53     | ENSMUSG00000044348  |
| chr1  | 60467108  | 60467130 -  | 4 CACACAAACCAAAAAAAGT   | AGG |    | 2493 Intronic    | Abi2         | ENSMUSG00000026782  |
| chrX  | 150869169 | 150869191 + | 4 AAAACTGATCAGAAAAAAGT  | AGG |    | 12116 Intergenic | Ith5l-ps     | ENSMUSG00000087149  |
| chr2  | 27409706  | 27409728 +  | 4 CACACCAATTAAAAAAAGT   | GGG |    | 7755 Intronic    | Gm24049      | ENSMUSG00000076364  |
| chr12 | 16522944  | 16522966 -  | 4 CAAGCCCATCAAAAAAATAA  | TGG |    | 12703 Intergenic | Lpin1        | ENSMUSG00000020593  |
| chr2  | 85979679  | 85979701 +  | 4 CACTGTATCAAAAAATTAAT  | GGG |    | 3460 Intergenic  | Olfir1029    | ENSMUSG00000059873  |
| chr16 | 57748992  | 57749014 +  | 4 AGCACTCTCAAAAAAATAA   | AGG |    | 5626 Intronic    | Col8a1       | ENSMUSG00000068196  |
| chrY  | 59626923  | 59626945 +  | 4 CAAAGTTATCAAAAAAAGG   | AGG |    | 1018 Intronic    | Gm20871      | ENSMUSG00000101005  |
| chrY  | 38794956  | 38794978 +  | 4 CAAAGTTATCAAAAAAAGG   | AGG |    | 1018 Intronic    | Gm20901      | ENSMUSG00000096275  |
| chrY  | 19118837  | 19118859 -  | 4 CAAAGTTATCAAAAAAAGG   | AGG |    | 1018 Intronic    | Gm35134      | ENSMUSG00000103371  |
| chrY  | 14406541  | 14406563 -  | 4 CAAAGTTATCAAAAAAAGG   | AGG |    | 1018 Intronic    | Gm30737      | ENSMUSG00000104191  |
| chrY  | 42936138  | 42936160 -  | 4 CAAAGTTATCAAAAAAAGG   | AGG |    | 1018 Intronic    | Gm29165      | ENSMUSG00000099833  |
| chrY  | 40311046  | 40311068 +  | 4 CAAAGTTATCAAAAAAAGG   | AGG |    | 1019 Intronic    | Gm21865      | ENSMUSG00000093895  |
| chrY  | 43957992  | 43958014 -  | 4 CAAAGTTATCAAAAAAAGG   | AGG |    | 1019 Intronic    | Gm21241      | ENSMUSG00000096332  |
| chrY  | 31377802  | 31377824 -  | 4 CAAAGTTATCAAAAAAAGG   | AGG |    | 1019 Intronic    | Gm21737      | ENSMUSG00000094623  |
| chrY  | 33250843  | 33250865 +  | 4 CAAAGTTATCAAAAAAAGG   | AGG |    | 1019 Intronic    | Gm21756      | ENSMUSG00000095049  |
| chrY  | 4789063   | 4789085 +   | 4 CAAAGTTATCAAAAAAAGG   | AGG |    | 1020 Intronic    | Gm28356      | ENSMUSG00000099684  |
| chrY  | 29356220  | 29356242 -  | 4 CAAAGTTATCAAAAAAAGG   | AGG |    | 1020 Intronic    | Gm21853      | ENSMUSG00000096538  |
| chrY  | 40925255  | 40925277 +  | 4 CAAAGTTATCAAAAAAAGG   | AGG |    | 1024 Intronic    | Gm20832      | ENSMUSG00000099645  |
| chrY  | 18506526  | 18506548 -  | 4 CAAAGTTATCAAAAAAAGG   | AGG |    | 1024 Intronic    | Gm30638      | ENSMUSG00000102264  |
| chrY  | 13793803  | 13793825 -  | 4 CAAAGTTATCAAAAAAAGG   | AGG |    | 1024 Intronic    | Gm36728      | ENSMUSG00000104404  |
| chrY  | 11698233  | 11698255 -  | 4 CAAAGTTATCAAAAAAAGG   | AGG |    | 1026 Intronic    | Gm28951      | ENSMUSG00000099572  |
| chrY  | 16383628  | 16383650 -  | 4 CAAAGTTATCAAAAAAAGG   | AGG |    | 1026 Intronic    | Gm32033      | ENSMUSG00000102208  |
| chrY  | 68826897  | 68826919 +  | 4 CAAAGTTATCAAAAAAAGG   | AGG |    | 1035 Intronic    | Gm20817      | ENSMUSG00000100032  |
| chrY  | 57193019  | 57193041 -  | 4 CAAAGTTATCAAAAAAAGG   | AGG |    | 1036 Intronic    | Sly          | ENSMUSG00000101155  |
| chrY  | 76767411  | 76767433 -  | 4 CAAAGTTATCAAAAAAAGG   | AGG |    | 1036 Intronic    | Gm21173      | ENSMUSG00000100708  |
| chrY  | 61652557  | 61652579 -  | 4 CAAAGTTATCAAAAAAAGG   | AGG |    | 1038 Intronic    | Gm21497      | ENSMUSG00000100726  |
| chrY  | 48862308  | 48862330 -  | 4 CAAAGTTATCAAAAAAAGG   | AGG |    | 1039 Intronic    | Gm28553      | ENSMUSG00000100972  |
| chr6  | 79828059  | 79828081 +  | 4 CAAAGTTATCAAAAAAAGG   | TGG |    | 9695 Intergenic  | Gm20594      | ENSMUSG00000096887  |
| chr3  | 67641770  | 67641792 -  | 4 CAAAGTTATCAAAAAAAGG   | GGG |    | 21042 Intergenic | Gm412        | ENSMUSG00000103606  |
| chr1  | 113233971 | 113233993 + | 4 CAAAGTTATCAAAAAAAGG   | TGG |    | 55347 Intergenic | Gm28189      | ENSMUSG00000101453  |
| chrX  | 156116296 | 156116318 + | 3 CACATTCATGAAAAAAGG    | TGG |    | 54497 Intronic   | Gm15155      | ENSMUSG00000055109  |
| chr1  | 61640835  | 61640857 +  | 4 CCCACACTCAAAAAAAGG    | AGG |    | 1473 Intronic    | Pard3b       | ENSMUSG00000052062  |
| chr6  | 149499811 | 149499833 + | 4 CACAACAATCAAAAAAAGG   | TGG |    | 2040 Intronic    | Bicd1        | ENSMUSG00000003452  |
| chr4  | 144353936 | 144353958 - | 4 CACAACAATCAAAAAAAGG   | TGG |    | 3984 Intergenic  | Gm13119      | ENSMUSG00000070619  |
| chr2  | 87404403  | 87404425 +  | 4 CACAACAATCAAAAAAAGG   | TGG |    | 9759 Intergenic  | Gm1826       | ENSMUSG00000082028  |
| chr8  | 66602928  | 66602950 -  | 4 CACAACAATCAAAAAAAGG   | TGG |    | 13920 Intergenic | Gm16330      | ENSMUSG00000085082  |
| chr18 | 17512983  | 17513005 +  | 4 CACAACAATCAAAAAAAGG   | TGG | NA | Intergenic       | NA           | NA                  |
| chr15 | 98663408  | 98663430 -  | 4 AACACTTTTCAAAAAAAGG   | GGG |    | 0 Exonic         | Rnd1         | ENSMUSG00000054855  |
| chr1  | 103227170 | 103227192 - | 4 TAAACTCATTAAAAAAGG    | AGG |    | 9434 Intronic    | Gm23965      | ENSMUSG00000088594  |
| chr16 | 93905611  | 93905633 -  | 3 CACACACATTAAAAAAAGG   | AGG |    | 272 Intronic     | Chaf1b       | ENSMUSG00000022945  |
| chr7  | 41077274  | 41077296 +  | 3 CACACACATTAAAAAAAGG   | AGG |    | 329 Intronic     | RP23-472J11  | ENSMUSG00000108619  |
| chr16 | 90141907  | 90141929 +  | 3 CACACGATCAAAAAAAGG    | AGG |    | 78813 Intergenic | Sod1         | ENSMUSG00000022982  |
| chr17 | 41730737  | 41730759 -  | 3 CACACACATGAAAAAAGG    | AGG | NA | Intergenic       | NA           | NA                  |
| chrX  | 9915487   | 9915509 -   | 4 GACCCTCATGAAAAAAGG    | AGG |    | 0 Exonic         | Syt15        | ENSMUSG00000054453  |
| chr4  | 31771808  | 31771830 +  | 4 CTCTCTCATAAAAAAAGG    | AGG | NA | Intergenic       | NA           | NA                  |
| chrX  | 145457842 | 145457864 + | 3 CACACTTATTAAAAAAAGG   | TGG |    | 1884 Intronic    | Amot         | ENSMUSG00000041688  |
| chr2  | 172733247 | 172733269 + | 4 CAAACGCAACAAAAAAGG    | AGG | NA | Intergenic       | NA           | NA                  |
| chr16 | 16779619  | 16779641 +  | 4 GCCACTCATCTAAAAAAGG   | TGG |    | 980 Intronic     | Spag6        | ENSMUSG00000022783  |
| chrX  | 14303246  | 14303268 -  | 4 TACATTCATCAAAAGAAAT   | AGG |    | 12133 Intergenic | Gm25202      | ENSMUSG00000064772  |
| chr13 | 47316461  | 47316483 -  | 4 AACAAATCATCAAAACAAAT  | AGG |    | 68470 Intergenic | Rnf144b      | ENSMUSG00000038068  |
| chr10 | 90701074  | 90701096 +  | 4 CACAGTAGTCAAAAAAAGG   | AGG |    | 17377 Intronic   | Anks1b       | ENSMUSG00000058589  |
| chr14 | 13950656  | 13950678 +  | 4 AACACCCATTAAAAAAAGG   | AGG |    | 291 Intronic     | Thoc7        | ENSMUSG00000053453  |
| chr13 | 102634963 | 102634985 + | 4 AACACACATTAAAAAAAGG   | AGG |    | 58573 Intergenic | Cd180        | ENSMUSG00000021624  |
| chr12 | 61784194  | 61784216 -  | 4 CAAAATCATTAAAAAAAGG   | TGG |    | 55192 Intronic   | Lrn5         | ENSMUSG00000035653  |
| chr7  | 79276899  | 79276921 +  | 4 CACAATCCTCAAAAGAAAT   | GGG |    | 846 Intronic     | RP23-256J14  | ENSMUSG00000108521  |
| chr10 | 31454983  | 31455005 +  | 4 CACTGTATTAAAAAAAGG    | AGG |    | 9062 Intergenic  | Tpd5211      | ENSMUSG00000002096  |
| chr19 | 53553968  | 53553990 +  | 4 CATACACATTAAAAAAAGG   | AGG |    | 11537 Intergenic | Dusp5        | ENSMUSG00000034765  |
| chr13 | 112781048 | 112781070 + | 4 AACAAATCATCAAAAAAAGG  | AGG |    | 19824 Intergenic | Ppap2a       | ENSMUSG00000021759  |

|       |           |             |                            |     |    |                  |               |                     |
|-------|-----------|-------------|----------------------------|-----|----|------------------|---------------|---------------------|
| chr7  | 131441362 | 131441384 - | 4 CTCACTTATTAATAAAAAAAAAAG | AGG |    | 23 Intronic      | Acad5b        | ENSMUSG00000030861  |
| chr17 | 26233111  | 26233133 +  | 4 CGCACTGATAAAAAAAAAAAAAA  | GGG |    | 7088 Intronic    | Fam234a       | ENSMUSG00000024187  |
| chr3  | 126479015 | 126479037 + | 4 CTCACTTATAAAAAAAAAAAAAA  | TGG |    | 31065 Intergenic | Gm20568       | ENSMUSG00000010523  |
| chr3  | 140133819 | 140133841 + | 4 GACACTTATCAACAAAAAAT     | GGG |    | 15784 Intergenic | Gm4863        | ENSMUSG000000105180 |
| chr4  | 102357257 | 102357279 - | 4 CAAACTGATAAAAAAAAAAAAAA  | TGG |    | 64239 Intronic   | Pde4b         | ENSMUSG00000028525  |
| chr4  | 119032956 | 119032978 - | 4 CACATACATGAAAAAAAAAAAAA  | AGG |    | 21812 Intergenic | Gm12866       | ENSMUSG000000066060 |
| chr7  | 77680261  | 77680283 -  | 4 CACAACCATGAAAAAAAAAAAAA  | AGG | NA | Intergenic       | NA            | NA                  |
| chr15 | 37246253  | 37246275 -  | 4 AACACTCTTAATAAAAAAAAAA   | AGG |    | 3091 Intronic    | Gm16137       | ENSMUSG000000089949 |
| chr17 | 70786706  | 70786728 +  | 3 CACACCCATCAAAACAAACT     | GGG |    | 60 Intronic      | Dlgap1        | ENSMUSG00000003279  |
| chr5  | 62065005  | 62065027 +  | 4 CAAACTCCTAAAAAAAAAAAAA   | AGG |    | 60170 Intergenic | Gm42430       | ENSMUSG000000106530 |
| chr8  | 44205307  | 44205329 -  | 4 CACAATGATAAAAAAAAAAAAAA  | TGG |    | 22389 Intergenic | Gm37972       | ENSMUSG000000102378 |
| chrX  | 20825562  | 20825584 -  | 4 CACACAGATGAAAAAAAAAAAAA  | TGG |    | 1748 Intronic    | Gm24824       | ENSMUSG00000092838  |
| chrX  | 159436356 | 159436378 - | 4 CACACATATGAAAAAAAAAAAAA  | AGG |    | 7545 Intronic    | Map7d2        | ENSMUSG000000041020 |
| chr11 | 72422986  | 72423008 +  | 4 CACACAAATTAATAAAAAAAAAA  | AGG |    | 11273 Intergenic | Smtnl2        | ENSMUSG000000045667 |
| chr13 | 53233058  | 53233080 -  | 4 CACACAAATGAAAAAAAAAAAAA  | GGG |    | 42411 Intronic   | Ror2          | ENSMUSG00000021464  |
| chr16 | 82872720  | 82872742 +  | 4 CACACTGGACAAAAAAAAAAAAA  | AGG |    | 42839 Intergenic | Gm21833       | ENSMUSG000000094030 |
| chr16 | 38543501  | 38543523 -  | 4 CACACACTTAAAAAAAAAAAAA   | AGG |    | 542 Intronic     | Poglut1       | ENSMUSG000000034064 |
| chr3  | 74333603  | 74333625 -  | 4 CACCATCATATAAAAAAAG      | GGG |    | 9611 Intergenic  | Gm37050       | ENSMUSG000000104227 |
| chr8  | 15742126  | 15742148 +  | 4 AATACTCATCAACAAAAAAG     | TGG | NA | Intergenic       | NA            | NA                  |
| chr13 | 99664774  | 99664796 +  | 4 CAAACACATCAGAAAAAAG      | AGG |    | 21971 Intergenic | 1700012J22Rik | ENSMUSG000000103545 |
| chr2  | 57612319  | 57612341 +  | 4 GACACTAATCACAATAAAAG     | AGG |    | 16648 Intergenic | Gm13532       | ENSMUSG000000081642 |
| chr6  | 123962180 | 123962202 + | 4 AACACTAATCAAAAAGAAAGT    | TGG |    | 1431 Intronic    | A330044P14Ri  | ENSMUSG000000093385 |
| chr6  | 123831969 | 123831991 + | 4 AACACTAATCAAAAAGAAAGT    | TGG |    | 3399 Intronic    | Vmn2r25       | ENSMUSG000000094672 |
| chr6  | 124047194 | 124047216 - | 4 AACACTAATCAAAAAGAAAGT    | TGG |    | 3413 Intronic    | Vmn2r26       | ENSMUSG000000096630 |
| chr1  | 134267058 | 134267080 + | 4 AACACTAATCAAAAAGAAAGT    | TGG |    | 13805 Intergenic | Gm24517       | ENSMUSG000000096676 |
| chr9  | 102418601 | 102418623 - | 4 CAGACTAATCAAAAATAAAGT    | AGG |    | 45381 Intergenic | Gm22894       | ENSMUSG000000088138 |
| chr1  | 94176464  | 94176486 -  | 3 CATACTCATCAAGAAAAAG      | TGG |    | 27931 Intergenic | Gm7891        | ENSMUSG000000100990 |
| chr13 | 66427358  | 66427380 +  | 4 CGCACTCCTCAAAAAGAAAGT    | GGG |    | 2340 Intronic    | 2410141K09Rik | ENSMUSG000000074832 |
| chr13 | 66223498  | 66223520 +  | 4 CGCACTCCTCAAAAAGAAAGT    | GGG |    | 3799 Intergenic  | Gm10772       | ENSMUSG000000091347 |
| chr13 | 65543206  | 65543228 +  | 4 CGCACTCCTCAAAAAGAAAGT    | GGG |    | 15938 Intergenic | Cbx3-ps2      | ENSMUSG000000095692 |
| chr7  | 45925775  | 45925797 -  | 4 CAGACTCTTCAGAAAAAAG      | GGG |    | 708 Intronic     | Ccdc114       | ENSMUSG000000040189 |
| chr18 | 70745395  | 70745417 -  | 4 CACCCTCCTATAAAAAAAG      | AGG | NA | Intergenic       | NA            | NA                  |
| chr5  | 74082331  | 74082353 -  | 4 ATACTCATCAATAAAAAAG      | CGG |    | 9784 Intergenic  | Gm43416       | ENSMUSG000000107255 |
| chr8  | 105397044 | 105397066 - | 4 CACACCAATCATAAAAAAAG     | TGG |    | 564 Intronic     | Kctd19        | ENSMUSG000000051648 |
| chr13 | 54699749  | 54699771 -  | 4 CACACGAATCAAAAAGAAAGT    | GGG |    | 1690 Intergenic  | Cdhr2         | ENSMUSG000000034918 |
| chr6  | 86256835  | 86256857 +  | 4 TACACTCCTCAAAAAGAAAGT    | AGG |    | 4698 Intronic    | RP23-304D1.6  | ENSMUSG000000107745 |
| chr4  | 122290683 | 122290705 - | 4 AACACTCTTCAAAAAGAAAGT    | AGG |    | 54766 Intergenic | Gm12893       | ENSMUSG000000083867 |
| chr4  | 121897697 | 121897719 - | 4 AACACTCTTCAAAAAGAAAGT    | AGG | NA | Intergenic       | NA            | NA                  |
| chr4  | 109343906 | 109343928 - | 3 CACACTTATCAAAAATAAAG     | AGG |    | 550 Intronic     | Eps15         | ENSMUSG000000028552 |
| chrX  | 114446060 | 114446082 - | 4 AACACTGATCAAAAATAAAGT    | TGG |    | 28251 Intergenic | Kihl4         | ENSMUSG000000025597 |
| chr8  | 127102552 | 127102574 + | 4 AACACTGATCAAAAAGAAAGT    | TGG |    | 29266 Intronic   | Pard3         | ENSMUSG000000025812 |
| chr3  | 64987022  | 64987044 +  | 4 AACACTGATCAAAAATAAAGT    | TGG |    | 37489 Intronic   | Gm38048       | ENSMUSG000000102437 |
| chr3  | 112134394 | 112134416 + | 4 AACACTAATCAAAAAGAAAGT    | TGG |    | 52393 Intergenic | Gm6602        | ENSMUSG000000104543 |
| chr9  | 10844861  | 10844883 +  | 4 CACACTGGTCAAAAATAAAT     | TGG |    | 59477 Intronic   | Cntn5         | ENSMUSG000000039488 |
| chr11 | 29031617  | 29031639 +  | 4 CACTTTCATCAAAAAGAAAG     | TGG |    | 74009 Intergenic | Rpsa-ps5      | ENSMUSG000000081695 |
| chr1  | 30465491  | 30465513 +  | 4 AACACTAATCAAAAAGAAAGT    | AGG | NA | Intergenic       | NA            | NA                  |
| chr9  | 15744290  | 15744312 +  | 4 CACCCTGATCAAAAAGAAAGT    | TGG |    | 1906 Intergenic  | Slc36a4       | ENSMUSG000000043885 |
| chr13 | 75556457  | 75556479 +  | 4 CACAATCAAAAAGAAAGT       | TGG |    | 88385 Intergenic | Gm4149        | ENSMUSG000000074800 |
| chr10 | 33220319  | 33220341 +  | 4 CACTCTCTCAAAAATAAAGT     | TGG |    | 13514 Intronic   | Trdn          | ENSMUSG000000019787 |
| chr10 | 33038926  | 33038948 +  | 4 CACTCTCTCAAAAATAAAGT     | TGG |    | 44535 Intergenic | Trdn          | ENSMUSG000000019787 |
| chr4  | 80707874  | 80707896 -  | 4 CACTCTCTCAAAAATAAAGT     | TGG | NA | Intergenic       | NA            | NA                  |
| chr4  | 85254397  | 85254419 +  | 4 CACAATCAAAAAGAAAGT       | AGG |    | 8635 Intronic    | Gm12413       | ENSMUSG000000081862 |
| chr9  | 44233305  | 44233327 -  | 4 CACACAGATCAAAAAGAAAGT    | AGG |    | 34 Intronic      | Cbl           | ENSMUSG000000034342 |
| chr3  | 13663517  | 13663539 -  | 4 CACACAAATCAAAAAGAAAGT    | AGG |    | 5970 Intergenic  | Gm37164       | ENSMUSG000000104514 |
| chr2  | 87293013  | 87293035 +  | 4 CATATTCATCAAAAAGAAAG     | AGG |    | 7741 Intergenic  | Olfri1117-ps1 | ENSMUSG000000083706 |
| chr5  | 48692365  | 48692387 +  | 4 CAAAGTCATCAAAAAGAAAGT    | AGG |    | 19703 Intronic   | Gm43829       | ENSMUSG000000105530 |
| chr7  | 18361784  | 18361806 +  | 4 CAAAGTCATCAAAAAGAAAGT    | AGG |    | 6775 Intergenic  | Psg18         | ENSMUSG00000003505  |
| chr6  | 106363460 | 106363482 - | 4 CAAAGTCATCAAAAAGAAAGT    | AGG |    | 9680 Intronic    | Cntn4         | ENSMUSG000000064293 |
| chr17 | 68547417  | 68547439 -  | 4 CAAAGTCATCAAAAAGAAAGT    | AGG |    | 12310 Intronic   | L3mbtl4       | ENSMUSG000000041565 |
| chr10 | 33694022  | 33694044 -  | 4 CAAAGTCATCAAAAAGAAAGT    | AGG |    | 31590 Intergenic | Gm15939       | ENSMUSG000000090087 |
| chr13 | 88528216  | 88528238 -  | 4 CAAAGTCATCAAAAAGAAAGT    | AGG |    | 49160 Intergenic | Gm8526        | ENSMUSG000000057685 |
| chr16 | 69704203  | 69704225 -  | 4 CAAAGTCATCAAAAAGAAAGT    | AGG |    | 91910 Intergenic | Gm43265       | ENSMUSG000000107073 |
| chr16 | 27693333  | 27693355 +  | 4 CAAAGTCATCAAAAAGAAAGT    | AGG | NA | Intergenic       | NA            | NA                  |
| chr8  | 54318756  | 54318778 +  | 4 CAAAGTCATCAAAAAGAAAGT    | AGG | NA | Intergenic       | NA            | NA                  |
| chr16 | 51175994  | 51176016 +  | 4 CAAAGTCATCAAAAAGAAAGT    | AGG | NA | Intergenic       | NA            | NA                  |
| chr15 | 33726465  | 33726487 -  | 4 CAAACTTATCAAAAAGAAAGT    | GGG |    | 38582 Intergenic | Tspy15        | ENSMUSG000000038984 |
| chr4  | 114151879 | 114151901 - | 4 CAAACTTATCAAAAAGAAAGT    | AGG |    | 11483 Intergenic | Skint11       | ENSMUSG000000057977 |
| chr8  | 94490493  | 94490515 -  | 4 CAGACTCTTCAAAAAGAAAGT    | AGG |    | 71 Intronic      | Nlrc5         | ENSMUSG000000074151 |
| chr7  | 58305221  | 58305243 -  | 4 CTCACACATCAAAAAGAAAG     | TGG | NA | Intergenic       | NA            | NA                  |
| chr2  | 98411426  | 98411448 +  | 3 CAAACTGATCAAAAAGAAAG     | AGG | NA | Intergenic       | NA            | NA                  |
| chr5  | 18262360  | 18262382 +  | 4 ATCACTGATCAAAAAGAAAGT    | AGG |    | 2753 Intergenic  | Gnai1         | ENSMUSG000000057614 |
| chr7  | 87885576  | 87885598 +  | 4 TGCACATCAAAAAGAAAGT      | TGG |    | 75956 Intronic   | Grm5          | ENSMUSG000000049583 |
| chr5  | 46627962  | 46627984 +  | 4 AAAAGTCATCAAAAAGAAAG     | AGG | NA | Intergenic       | NA            | NA                  |
| chr14 | 16703542  | 16703564 +  | 4 TAAACTCATCAAAAATAAAG     | AGG | NA | Intergenic       | NA            | NA                  |
| chr17 | 22382670  | 22382692 +  | 4 CCCAGTCATCAAAAAGAAAG     | AGG |    | 5389 Intergenic  | Zfp758        | ENSMUSG000000044501 |
| chr13 | 8039218   | 8039240 +   | 4 CAAAGTCATCAAAAAGAAAG     | AGG |    | 1112 Intergenic  | Gm9742        | ENSMUSG000000091053 |
| chr9  | 91219517  | 91219539 +  | 4 CAAAGTCATCAAAAAGAAAG     | AGG |    | 3061 Intergenic  | Gm29602       | ENSMUSG000000100568 |
| chr10 | 100791681 | 100791703 - | 4 CAAAGTCATCAAAAAGAAAG     | AGG |    | 3458 Intergenic  | Gm38219       | ENSMUSG000000103550 |
| chr6  | 130468085 | 130468107 + | 4 CAAATTCATCAAAAAGAAAG     | AGG |    | 5463 Intronic    | RP23-451F7.8  | ENSMUSG000000107492 |
| chr6  | 68127317  | 68127339 -  | 4 CAAAGTCATCAAAAAGAAAG     | AGG |    | 5490 Intergenic  | Igkv1-117     | ENSMUSG000000094335 |
| chr3  | 7544861   | 7544883 +   | 4 CAAAGTCATCAAAAAGAAAG     | AGG |    | 5678 Intronic    | Zc2hc1a       | ENSMUSG000000043542 |
| chr6  | 68277545  | 68277567 -  | 4 CAAAGTCATCAAAAAGAAAG     | AGG |    | 6278 Intergenic  | Igkv1-110     | ENSMUSG000000093861 |
| chr2  | 36345315  | 36345337 -  | 4 CAAAGTCATCAAAAAGAAAG     | AGG |    | 8235 Intergenic  | Olfri337-ps1  | ENSMUSG000000080936 |
| chrX  | 17310692  | 17310714 +  | 4 CAAAGTCATCAAAAAGAAAG     | AGG |    | 8528 Intronic    | Efhc2         | ENSMUSG000000025038 |
| chr19 | 39220318  | 39220340 -  | 4 CAAAGTCATCAAAAAGAAAG     | AGG |    | 8914 Intergenic  | Cyp2c5-ps     | ENSMUSG000000093610 |

|       |           |             |   |                     |     |       |            |               |                     |
|-------|-----------|-------------|---|---------------------|-----|-------|------------|---------------|---------------------|
| chr3  | 139253209 | 139253231 - | 4 | CAAAGTCATCAAAAAGAAA | AGG | 10024 | Intronic   | Stgp2         | ENSMUSG00000047940  |
| chrY  | 1799198   | 1799220 -   | 4 | CAAAGTCATCAAAAAGAAA | AGG | 10031 | Intergenic | Gm29167       | ENSMUSG00000101947  |
| chr6  | 132923297 | 132923319 + | 4 | CAAAGTCATCAAAAAGAAA | AGG | 10648 | Intergenic | Tas2r146-ps1  | ENSMUSG00000108261  |
| chrX  | 62147330  | 62147352 +  | 4 | CAAAGTCATCAAAAAGAAA | AGG | 11002 | Intergenic | Gm5390        | ENSMUSG00000083617  |
| chr8  | 7369840   | 7369862 +   | 4 | CAAAGTCATCAAAAAGAAA | AGG | 11153 | Intergenic | Gm17215       | ENSMUSG00000092092  |
| chr8  | 129205129 | 129205151 + | 4 | CAAAGTCATCAAAAAGAAA | AGG | 11203 | Intergenic | 2610044015Rii | ENSMUSG00000071302  |
| chr6  | 68400774  | 68400796 +  | 4 | CAAAGTCATCAAAAAGAAA | AGG | 11703 | Intergenic | Gm5310        | ENSMUSG00000105248  |
| chrX  | 13972621  | 13972643 -  | 4 | CAAAGTCATCAAAAAGAAA | AGG | 12742 | Intergenic | Gm25552       | ENSMUSG00000088706  |
| chr7  | 11897306  | 11897328 -  | 4 | CAAAGTCATCAAAAAGAAA | AGG | 13918 | Intergenic | Vmn1r-ps56    | ENSMUSG00000092285  |
| chr8  | 65143512  | 65143534 -  | 4 | CAAAGTCATCAAAAAGAAA | AGG | 13949 | Intergenic | BC030870      | ENSMUSG00000074300  |
| chr17 | 38244910  | 38244932 -  | 4 | CAAAGTCATCAAAAAGAAA | AGG | 16135 | Intergenic | Olf1r138      | ENSMUSG00000057443  |
| chr7  | 10342485  | 10342507 -  | 4 | CAAAGTCATCAAAAAGAAA | AGG | 16366 | Intergenic | Nlrp4d        | ENSMUSG00000034122  |
| chr11 | 49388074  | 49388096 +  | 4 | CAAAGTCATCAAAAAGAAA | AGG | 16524 | Intergenic | Gm12189       | ENSMUSG00000084278  |
| chrX  | 4472675   | 4472697 -   | 4 | CAAAGTCATCAAAAAGAAA | AGG | 16672 | Intergenic | Gm9427        | ENSMUSG00000080073  |
| chr19 | 33536418  | 33536440 -  | 4 | CAAAGTCATCAAAAAGAAA | AGG | 18638 | Intronic   | Lipo4         | ENSMUSG00000079344  |
| chrX  | 90439336  | 90439358 +  | 4 | CAAAGTCATCAAAAAGAAA | AGG | 19964 | Intergenic | Gm4746        | ENSMUSG00000082479  |
| chr6  | 66231929  | 66231951 -  | 4 | CAAAGTCATCAAAAAGAAA | AGG | 22792 | Intergenic | RP23-478C7.1  | ENSMUSG00000107695  |
| chr1  | 150190960 | 150190982 - | 4 | CAAAGTCATCAAAAAGAAA | AGG | 26012 | Intergenic | Ptgs2os2      | ENSMUSG00000097754  |
| chr18 | 37589683  | 37589705 +  | 4 | CAAAGTCATCAAAAAGAAA | AGG | 29201 | Intronic   | 4930517L18Rik | ENSMUSG00000104225  |
| chr15 | 44315893  | 44315915 +  | 4 | CAAAGTCATCAAAAAGAAA | AGG | 29735 | Intergenic | Gm24903       | ENSMUSG00000088756  |
| chr3  | 113089901 | 113089923 + | 4 | CAAAGTCATCAAAAAGAAA | AGG | 33276 | Intergenic | Gm38395       | ENSMUSG00000105665  |
| chrX  | 137534494 | 137534516 - | 4 | CAAAGTCATCAAAAAGAAA | AGG | 36092 | Intergenic | Il1rapl2      | ENSMUSG00000059203  |
| chr8  | 63817555  | 63817577 +  | 4 | CAAAGTCATCAAAAAGAAA | AGG | 38503 | Intergenic | Gm5350        | ENSMUSG00000098106  |
| chr9  | 85062119  | 85062141 +  | 4 | CAAAGTCATCAAAAAGAAA | AGG | 42624 | Intergenic | Gm28070       | ENSMUSG00000101673  |
| chr17 | 81837589  | 81837611 -  | 4 | CAAAGTCATCAAAAAGAAA | AGG | 45656 | Intergenic | Rpl31-ps25    | ENSMUSG00000097897  |
| chr15 | 46028134  | 46028156 +  | 4 | CAAAGTCATCAAAAAGAAA | AGG | 48097 | Intergenic | Gm5472        | ENSMUSG00000096157  |
| chr11 | 8056844   | 8056866 +   | 4 | CAAATCATCAAAAAGAAA  | AGG | 51828 | Intergenic | Gm24051       | ENSMUSG00000089247  |
| chrX  | 109455183 | 109455205 - | 4 | CAAAGTCATCAAAAAGAAA | AGG | 63018 | Intergenic | Gm4784        | ENSMUSG00000082189  |
| chrX  | 5542397   | 5542419 -   | 4 | CAAAGTCATCAAAAAGAAA | AGG | 66153 | Intergenic | Gm14366       | ENSMUSG00000082326  |
| chr3  | 43476239  | 43476261 +  | 4 | CAAAGTCATCAAAAAGAAA | AGG | 70912 | Intergenic | Gm36976       | ENSMUSG00000104303  |
| chr14 | 9098612   | 9098634 +   | 4 | CAAAGTCATCAAAAAGAAA | AGG | NA    | Intergenic | NA            | NA                  |
| chrX  | 17448219  | 17448241 +  | 4 | CAAAGTCATCAAAAAGAAA | AGG | NA    | Intergenic | NA            | NA                  |
| chr8  | 54336974  | 54336996 +  | 4 | CAAAGTCATCAAAAAGAAA | AGG | NA    | Intergenic | NA            | NA                  |
| chr8  | 52877304  | 52877326 +  | 4 | CAAAGTCATCAAAAAGAAA | AGG | NA    | Intergenic | NA            | NA                  |
| chr8  | 51581196  | 51581218 +  | 4 | CAAAGTCATCAAAAAGAAA | AGG | NA    | Intergenic | NA            | NA                  |
| chr5  | 40140103  | 40140125 +  | 4 | CAAATCATCAAAAAGAAA  | AGG | NA    | Intergenic | NA            | NA                  |
| chr8  | 8159388   | 8159410 +   | 4 | CAAAGTCATCAAAAAGAAA | AGG | NA    | Intergenic | NA            | NA                  |
| chr3  | 42706978  | 42707000 -  | 4 | CAAAGTCATCAAAAAGAAA | AGG | NA    | Intergenic | NA            | NA                  |
| chr14 | 95475521  | 95475543 -  | 4 | CAAAGTCATCAAAAAGAAA | AGG | NA    | Intergenic | NA            | NA                  |
| chr17 | 54775135  | 54775157 -  | 4 | CAAAGTCATCAAAAAGAAA | AGG | NA    | Intergenic | NA            | NA                  |
| chr3  | 110832156 | 110832178 - | 4 | CAAAGTCATCAAAAAGAAA | AGG | NA    | Intergenic | NA            | NA                  |
| chrX  | 143772054 | 143772076 - | 4 | CAAATTTATCAAAAAGAAA | AGG | 2286  | Intronic   | Pak3          | ENSMUSG000000031284 |
| chr1  | 109798515 | 109798537 + | 4 | CAAATTTATCAAAAAGAAA | AGG | 6223  | Intergenic | Gm25293       | ENSMUSG00000084741  |
| chr4  | 37269996  | 37270018 -  | 4 | CAAATTTATCAAAAAGAAA | AGG | 20438 | Intronic   | Gm12374       | ENSMUSG00000086026  |
| chrX  | 15343576  | 15343598 +  | 4 | CAAATTTATCAAAAAGAAA | AGG | 21581 | Intergenic | Gm14519       | ENSMUSG00000082838  |
| chr4  | 78461286  | 78461308 +  | 4 | CACAGTTATCAAAAAGAAA | AGG | NA    | Intergenic | NA            | NA                  |
| chr4  | 129153242 | 129153242 - | 4 | CACACACCTCAAAAAGAAA | AGG | 2129  | Intronic   | S100ppb       | ENSMUSG00000040928  |
| chr10 | 21936219  | 21936241 +  | 4 | CACACACCTCAAAAAGAAA | GGG | 7668  | Intronic   | Sgk1          | ENSMUSG00000019970  |
| chr7  | 5816912   | 5816934 -   | 4 | CAAATTTATCAAAAAGAAA | AGG | 11467 | Intergenic | Vmn1r63       | ENSMUSG00000058631  |
| chr10 | 77348205  | 77348227 -  | 3 | CACAGTCATCAAAAAGAAA | AGG | 8029  | Intronic   | Adarb1        | ENSMUSG00000020262  |
| chrX  | 10517957  | 10517979 +  | 4 | GGCACTCATCAAAAAGAAA | GGG | 7801  | Intronic   | Gm25885       | ENSMUSG00000088404  |
| chr4  | 107057377 | 107057399 - | 4 | CCCAGTCATCAAAAAGAAA | TGG | 0     | Exonic     | Mpl37         | ENSMUSG00000028622  |
| chr7  | 86235583  | 86235605 -  | 4 | CAAAGTCATCAAAAAGAAA | AGG | 4313  | Intronic   | Vmn2r76       | ENSMUSG00000091239  |
| chr6  | 60606333  | 60606355 +  | 4 | CAAAGTCATCAAAAAGAAA | AGG | 15144 | Intergenic | RP24-89H23.1  | ENSMUSG00000108003  |
| chr2  | 65650992  | 65651014 -  | 4 | CAAAGTCATCAAAAAGAAA | AGG | 17672 | Intronic   | Scn2a1        | ENSMUSG00000075318  |
| chr7  | 125013982 | 125014004 - | 4 | CAAAGTCATCAAAAAGAAA | AGG | 53025 | Intergenic | RP24-178G20   | ENSMUSG00000108407  |
| chr14 | 91164398  | 91164420 -  | 4 | CAAAGTCATCAAAAAGAAA | AGG | 56106 | Intergenic | Gm23225       | ENSMUSG00000088746  |
| chr8  | 55580533  | 55580555 +  | 4 | CAAAGTCATCAAAAAGAAA | AGG | NA    | Intergenic | NA            | NA                  |
| chr9  | 16609244  | 16609266 +  | 4 | CAAAGTCATCAAAAAGAAA | AGG | NA    | Intergenic | NA            | NA                  |
| chr12 | 14607531  | 14607553 -  | 4 | CAAAGTCATCAAAAAGAAA | AGG | NA    | Intergenic | NA            | NA                  |
| chr11 | 95354796  | 95354818 -  | 4 | CACAGGCATCAAAAAGAAA | GGG | 848   | Intronic   | Fam117a       | ENSMUSG00000038893  |
| chr8  | 119808110 | 119808132 - | 4 | CACACACCTCAAAAAGAAA | GGG | 1093  | Intergenic | Cotl1         | ENSMUSG00000031827  |

#P-4

Species: Mouse (Mus musculus GRCm38/mm10)

Input: TATTAGAAGAGCGAGGTCTGCGG

PAM: NGG

| Chromosome | start     | end         | strand | MM                   | target_seq | PAM   | distance   | position      | gene name          | gene id |
|------------|-----------|-------------|--------|----------------------|------------|-------|------------|---------------|--------------------|---------|
| chrX       | 7579594   | 7579616 +   | 0      | TATTAGAAGAGCGAGGTCTG | CGG        | 0     | Exonic     | Ppp1r3fos     | ENSMUSG00000039545 |         |
| chr7       | 50537428  | 50537450 -  | 3      | CTTTAGAAGAGTGAGGTCTG | TGG        | 11490 | Intronic   | Nell1os       | ENSMUSG00000085265 |         |
| chr2       | 148559444 | 148559466 + | 3      | GAATAGAAGAGAGAGGTCTG | AGG        | 65245 | Intergenic | Gm25866       | ENSMUSG00000088870 |         |
| chr1       | 180703680 | 180703702 - | 4      | GTTAAGAAGAGGGAGGTCTG | TGG        | 6646  | Intergenic | Mixl1         | ENSMUSG00000026497 |         |
| chr5       | 35787005  | 35787027 +  | 4      | GGTGAGAAGAGAGAGGTCTG | GGG        | 11426 | Intronic   | Ablim2        | ENSMUSG00000029095 |         |
| chr3       | 79994232  | 79994254 -  | 4      | CAAGAGAAGAGGGAGGTCTG | CGG        | 47952 | Intergenic | Fam198b       | ENSMUSG00000027955 |         |
| chr9       | 21633138  | 21633160 +  | 3      | CATTAGAGGAGAGAGGTCTG | TGG        | 84    | Intronic   | Smarca4       | ENSMUSG00000032187 |         |
| chr5       | 28162360  | 28162382 +  | 4      | TGATAGAGGACCCAGGTCTG | CGG        | 3312  | Intergenic | En2           | ENSMUSG00000039095 |         |
| chr5       | 91451610  | 91451632 +  | 4      | TGTGGGAAGAGAGAGGTCTG | AGG        | 48616 | Intergenic | Btc           | ENSMUSG00000082361 |         |
| chr14      | 19336816  | 19336838 +  | 4      | TTGTATAAGAGTGAGGTCTG | GGG        | 64889 | Intergenic | Gm9637        | ENSMUSG00000093814 |         |
| chr4       | 114719100 | 114719122 - | 4      | TGTTTTAAGAGTGAGGTCTG | GGG        | 31505 | Intergenic | Gm12829       | ENSMUSG00000085870 |         |
| chr7       | 127304060 | 127304082 + | 4      | GATCAGATGAGTGAGGTCTG | AGG        | 851   | Intronic   | Itgal         | ENSMUSG00000030830 |         |
| chr14      | 29188009  | 29188031 +  | 4      | CTTTAGCAGAGCCAGGTCTG | GGG        | 4368  | Intronic   | Cacna2d3      | ENSMUSG00000021991 |         |
| chr3       | 153068414 | 153068436 - | 3      | TATTAATAAGTGAGGTCTG  | AGG        | 86168 | Intergenic | St6galnac5    | ENSMUSG00000039037 |         |
| chr10      | 118770781 | 118770803 + | 4      | CTTTAGAAGTGAGGTCTG   | AGG        | 88546 | Intergenic | Dyrk2         | ENSMUSG00000028630 |         |
| chr6       | 134693269 | 134693291 + | 4      | TACAAGAACAGTGAGGTCTG | AGG        | 1967  | Intronic   | RP23-246J18.1 | ENSMUSG00000108166 |         |

|       |           |             |                           |     |                  |               |                     |
|-------|-----------|-------------|---------------------------|-----|------------------|---------------|---------------------|
| chr18 | 30321996  | 30322018 -  | 4 TGTTGGCAGAGCAAGGCTCG    | TGG | 152 Intronic     | Pik3c3        | ENSMUSG00000033628  |
| chr8  | 72164293  | 72164315 -  | 4 TTCTAGAAGACAGAGGCTCG    | TGG | 2811 Intronic    | Rab8a         | ENSMUSG00000003037  |
| chr17 | 24042572  | 24042594 +  | 4 TGTTATAAAGTGAGAGGCTCG   | AGG | 208 Intronic     | Prss27        | ENSMUSG000000050762 |
| chr13 | 53496537  | 53496559 -  | 4 TACTGGA AAAAGCCAGGCTCG  | CGG | 23463 Intergenic | Msx2          | ENSMUSG000000021469 |
| chr13 | 109329044 | 109329066 - | 3 TATTAGATCAGCTAGGCTCG    | AGG | 4220 Intronic    | Mir582        | ENSMUSG00000076946  |
| chr3  | 101664090 | 101664112 + | 4 TACTAGCAGGGAGAGGCTCG    | AGG | 27677 Intergenic | Gm43135       | ENSMUSG000000106070 |
| chr12 | 55856833  | 55856855 +  | 4 TATTTTAGGAGCCAGGCTCG    | AGG | 3236 Intronic    | Brms1l        | ENSMUSG000000012076 |
| chr12 | 75019678  | 75019700 +  | 4 TATTC AAGGAGCAAGGCTCG   | TGG | 11879 Intronic   | Kcnh5         | ENSMUSG000000034402 |
| chr3  | 38669184  | 38669206 +  | 4 TACTTGAAGAAGGAGGCTCG    | GGG | 53626 Intergenic | Gm43538       | ENSMUSG000000106168 |
| chr5  | 28602515  | 28602537 -  | 4 CACTAGAAGAACCAAGGCTCG   | AGG | 23555 Intronic   | Gm43161       | ENSMUSG000000104587 |
| chr2  | 151531252 | 151531274 - | 3 TATTA AAAAGAACCAAGGCTCG | GGG | 9457 Intergenic  | Gm14167       | ENSMUSG000000087433 |
| chr3  | 59357028  | 59357050 +  | 4 GGTTAGAAGGAGCAAGGCTCG   | TGG | 5861 Intergenic  | Gm38186       | ENSMUSG000000103668 |
| chr10 | 27937793  | 27937815 -  | 4 GATGAGAAGGAGAAAGGCTCG   | GGG | 965 Intergenic   | Gm10145       | ENSMUSG000000064208 |
| chr2  | 146470509 | 146470531 - | 4 AATTAGAGGACCAAGGCTCG    | AGG | 8846 Intronic    | Ralgapa2      | ENSMUSG000000037110 |
| chr19 | 42688813  | 42688835 +  | 4 TATTAGCATGGGCAAGGCTCG   | AGG | 10942 Intergenic | Gm25216       | ENSMUSG000000102768 |
| chr9  | 44555490  | 44555512 +  | 4 TGTTGGAAGAGAGTGGTCTCG   | GGG | 689 Intronic     | Cxcr5         | ENSMUSG000000047880 |
| chr6  | 120259486 | 120259508 + | 3 TCTAAGAAGAGCGAGGACTG    | AGG | 16843 Intronic   | B4galnt3      | ENSMUSG000000041372 |
| chr13 | 92721717  | 92721739 -  | 4 CATCAGAAGAACGACGCTCG    | AGG | 9773 Intergenic  | Serinc5       | ENSMUSG000000021703 |
| chr1  | 71861152  | 71861174 -  | 4 AATTAGCAGAGAGGGTCTCG    | GGG | 14542 Intergenic | Gm37217       | ENSMUSG000000102689 |
| chr2  | 4485517   | 4485539 -   | 4 TTTAAGAAGAGCAGGGTCTCG   | AGG | 1385 Intronic    | Frm4a         | ENSMUSG000000026657 |
| chrX  | 17203791  | 17203813 -  | 4 AATTAGGGGAGCGAGCTCG     | TGG | 940 Intronic     | Efhc2         | ENSMUSG000000025038 |
| chr19 | 53344536  | 53344558 +  | 4 CACTGGAAGAGCGAGGACTG    | TGG | 1893 Intronic    | Mxi1          | ENSMUSG000000025025 |
| chr16 | 15890186  | 15890208 -  | 4 TAATTGAAGAGGGAAGTCTCG   | GGG | 401 Intronic     | Spidr         | ENSMUSG000000041974 |
| chr1  | 121947969 | 121947991 + | 4 CATTAAAAGAGGAGGCTCG     | TGG | 21226 Intergenic | Gm15394       | ENSMUSG000000083584 |
| chr6  | 18215332  | 18215354 -  | 4 TTGTAGAAGAGCCAGTCTCG    | GGG | 1017 Intronic    | Cftr          | ENSMUSG000000041301 |
| chr9  | 16178477  | 16178499 -  | 4 TATAACAAGAGTGAGCTCG     | TGG | 68222 Intronic   | Fat3          | ENSMUSG000000074505 |
| chr6  | 3387973   | 3387995 -   | 4 TATGAGATGAGCTATGCTCG    | TGG | 2967 Intronic    | Samd9l        | ENSMUSG000000047735 |
| chr6  | 3428507   | 3428529 -   | 4 TATGAGATGAGCTATGCTCG    | TGG | 28567 Intergenic | Hepacam2      | ENSMUSG000000044156 |
| chr10 | 22886046  | 22886068 -  | 3 TATGAGAAGAGGGAGGCTCG    | AGG | 65918 Intergenic | Tcf21         | ENSMUSG000000045680 |
| chr11 | 42358942  | 42358964 +  | 4 TATAAGCAGAGCCAGTCTCG    | GGG | 37870 Intergenic | Gabra6        | ENSMUSG000000020428 |
| chr4  | 124861301 | 124861323 - | 4 TTTTAGGAGAGTGAGGCCCTG   | GGG | 310 Intronic     | Maneal        | ENSMUSG000000042763 |
| chr7  | 67846934  | 67846956 +  | 4 TATTGAAAGGGCAGGCTG      | GGG | 43438 Intergenic | 4833412C05Rik | ENSMUSG000000097697 |
| chr1  | 66693197  | 66693219 -  | 4 GATGAGAAGAGAGAGGCTG     | AGG | 473 Intronic     | Unc80         | ENSMUSG000000055567 |
| chr12 | 108313546 | 108313568 - | 4 CATTAGGAGAGCCAGGCTG     | GGG | 211 Intronic     | 4930478K11Rik | ENSMUSG000000097847 |
| chr17 | 69282379  | 69282401 +  | 4 TTTTAGATGAGCGAAGACTG    | TGG | 1484 Intronic    | Epb4113       | ENSMUSG000000024044 |
| chr13 | 64267636  | 64267658 -  | 4 GTTTTGAAGAGCGAGGCTC     | AGG | 0 Exonic         | 1810034E14Rik | ENSMUSG000000097101 |
| chr13 | 40235613  | 40235635 +  | 4 GOTTGAAAGAGCGAGGCTT     | GGG | 19803 Intronic   | Ofcc1         | ENSMUSG000000047094 |
| chr7  | 4597862   | 4597884 +   | 4 TTTGAGAAGAGTGAGGTCAG    | GGG | 30 Intronic      | Ptprh         | ENSMUSG000000035429 |
| chr7  | 4573211   | 4573233 +   | 4 TTTGAGAAGAGTGAGGTCAG    | GGG | 30 Intronic      | Ptprh         | ENSMUSG000000035429 |
| chr9  | 49718430  | 49718452 +  | 4 GATAAGAAGAGCAAGGTCAG    | AGG | 80226 Intronic   | Ncam1         | ENSMUSG000000039542 |
| chr5  | 20670367  | 20670389 +  | 4 TATAAGGAGAGCGAGTGCTG    | AGG | 9015 Intronic    | Magi2         | ENSMUSG000000040003 |
| chr4  | 106018041 | 106018063 + | 4 TAATAGATGAGAGAGGTCAG    | AGG | 42156 Intergenic | Gm24363       | ENSMUSG000000089065 |
| chr8  | 79987564  | 79987586 -  | 4 TTTGAGAAGAACGAGGCTA     | GGG | 547 Intronic     | Hhip          | ENSMUSG000000064325 |
| chr11 | 8521133   | 8521155 +   | 3 TATTTGAAGAGCAAGGCTC     | AGG | 1563 Intronic    | Tns3          | ENSMUSG000000020422 |
| chr1  | 166996977 | 166996999 - | 4 TTTTATAAGAGGGAGGCTC     | TGG | 1296 Intronic    | Gm16701       | ENSMUSG000000097823 |
| chrX  | 136525104 | 136525126 + | 4 TTTCCAGAAGAGCCAGGCTT    | TGG | 0 Exonic         | Kir3dl1       | ENSMUSG000000031424 |
| chrX  | 136457620 | 136457642 - | 4 TTTCCAGAAGAGCCAGGCTT    | TGG | 0 Exonic         | Kir3dl2       | ENSMUSG000000057439 |
| chr1  | 59094382  | 59094404 +  | 4 TATCAGATGAGGAGGCTC      | AGG | 94 Intronic      | Als2cr11      | ENSMUSG000000072295 |
| chr14 | 14260183  | 14260205 +  | 4 TATTATGAGAGCTAGGCTC     | AGG | 62705 Intergenic | Olfir31       | ENSMUSG000000072707 |
| chr3  | 33805801  | 33805823 -  | 4 TAATAGTAGAGCGAGGACTA    | GGG | 993 Intronic     | Ttc14         | ENSMUSG000000027677 |
