# Supplementary material for: Stabilization of Foxp3 expression by CRISPR-dCas9-based epigenome editing in mouse primary T cells
Source: PubMed Central journal article supplement (PMC5422987; doi:10.1186/s13072-017-0129-1), 2017-05-08
Supplement: 13072_2017_129_MOESM3_ESM.pdf [file 13072_2017_129_MOESM3_ESM.pdf]

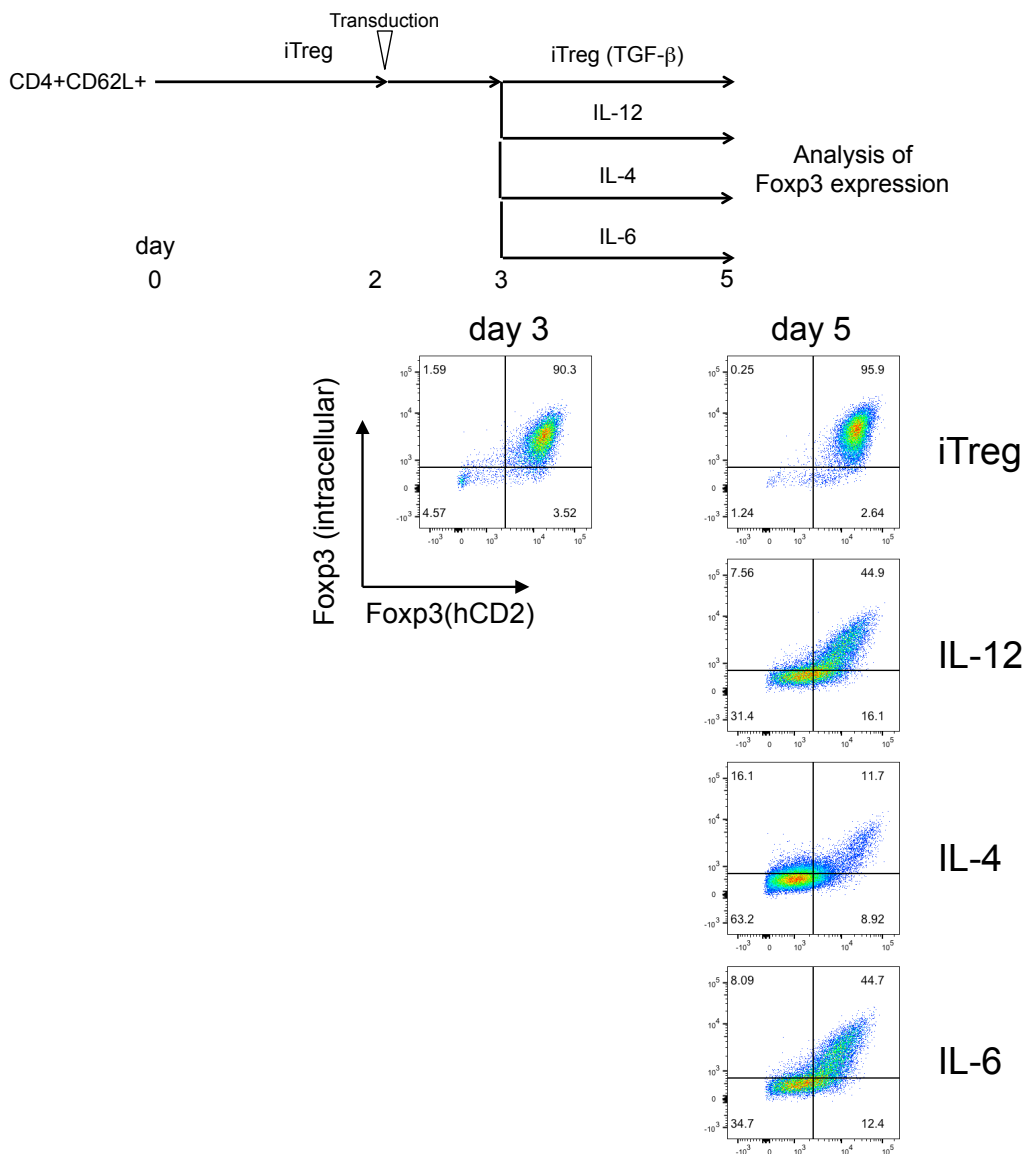

Supplementary Figure 1.  
Okada et al.

**a**

Gated on live cell, CD4(+)

GFP(+), DsRed(-)  
GFP(+), DsRed(+)

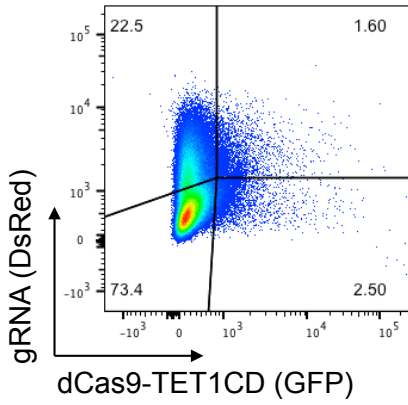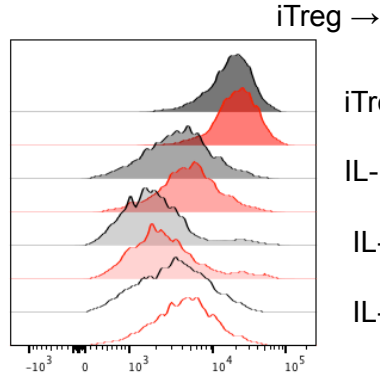

|       |                      | Foxp3(+) |
|-------|----------------------|----------|
| iTreg | dCas9-TET1CD         | 98.2     |
|       | dCas9-TET1CD / #C2-7 | 97.6     |
| IL-12 | dCas9-TET1CD         | 61.1     |
|       | dCas9-TET1CD / #C2-7 | 74.4     |
| IL-4  | dCas9-TET1CD         | 27.6     |
|       | dCas9-TET1CD / #C2-7 | 38.2     |
| IL-6  | dCas9-TET1CD         | 55.6     |
|       | dCas9-TET1CD / #C2-7 | 69.0     |

**b**

Foxp3/Hprt1

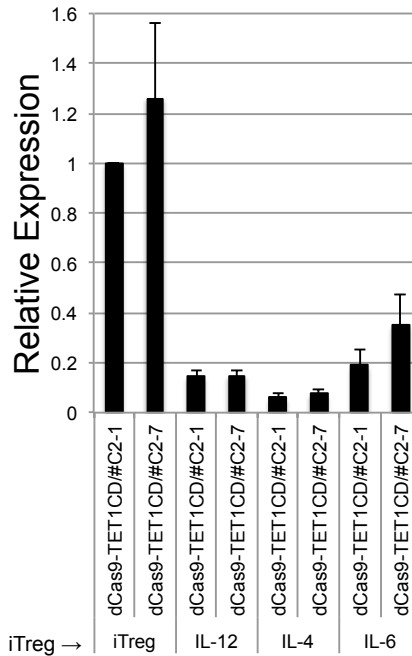

means ± SD, n=3

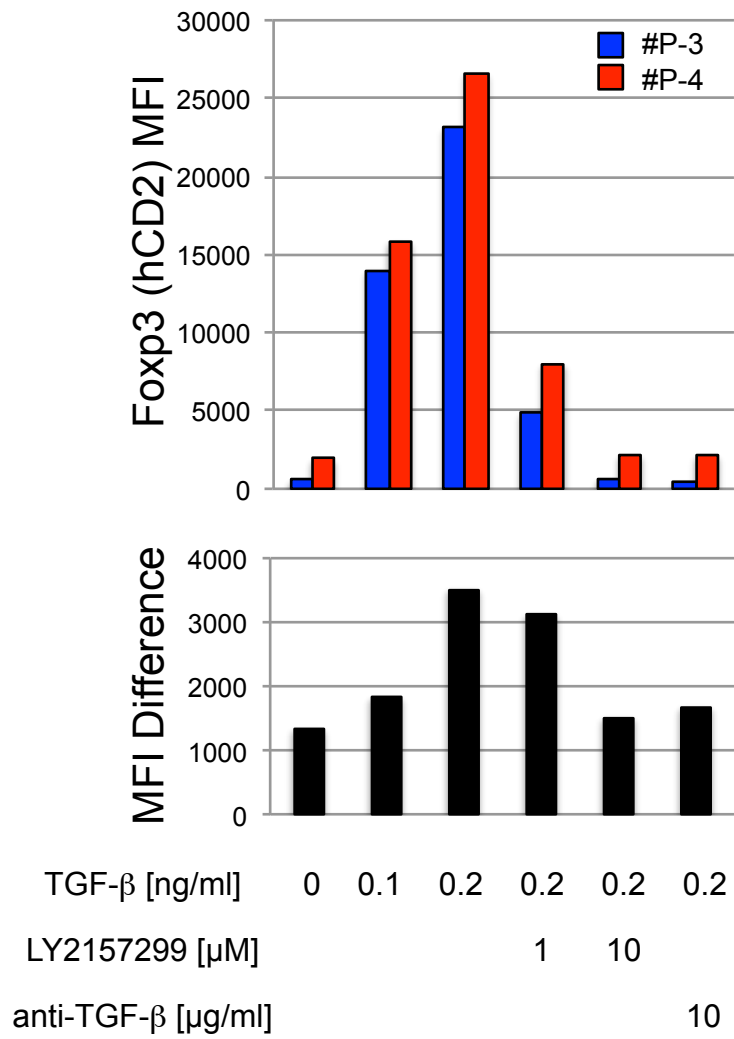

**a**

Gated on live cell, CD4(+), hCD2(+)

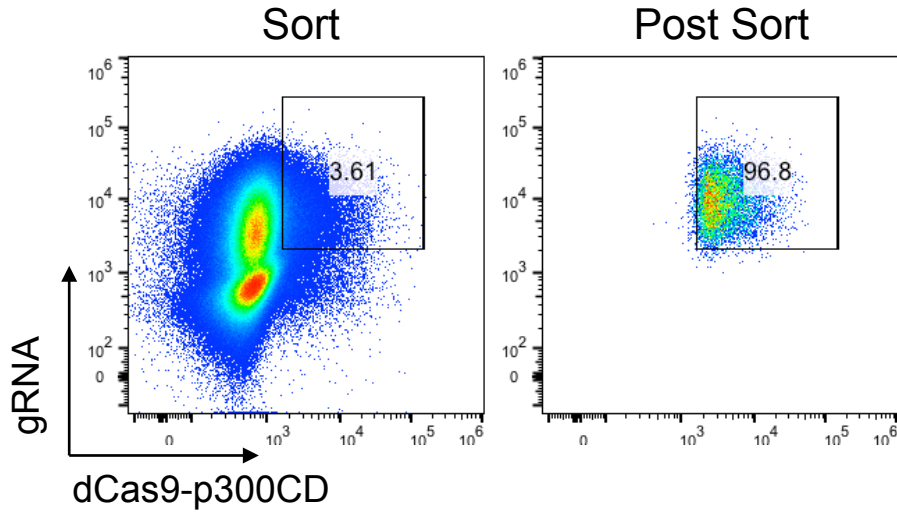

**b**

Gated on live cell, CD4(+)

Teff : Treg

2:1

4:1

8:1

CD45.1(+)

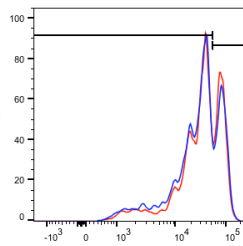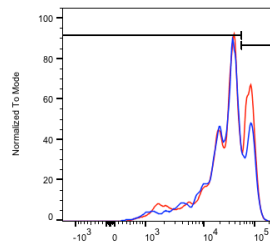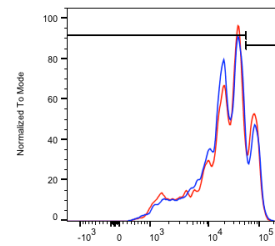

CD45.1(-)

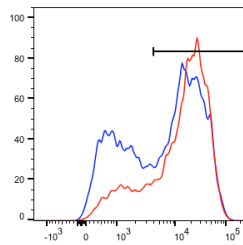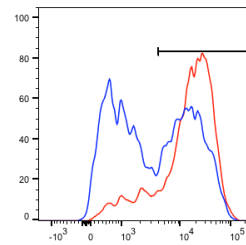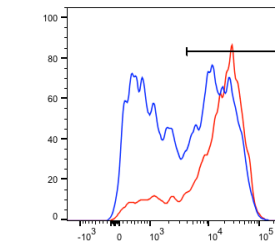

— : dCas9-p300CD / #P-4  
— : dCas9-p300CD mutant / #P-4
